# Supplementary material for: Heartbeat Induces a Cortical Theta-Synchronized Network in the Resting State
Source: PubMed Central journal article supplement (PMC6709221; doi:10.1523/eneuro.0200-19.2019), 2019-08-08
Supplement: sup_enu-eN-NWR-0200-19-s01.pdf [file sup_enu-eN-NWR-0200-19-s01.pdf]

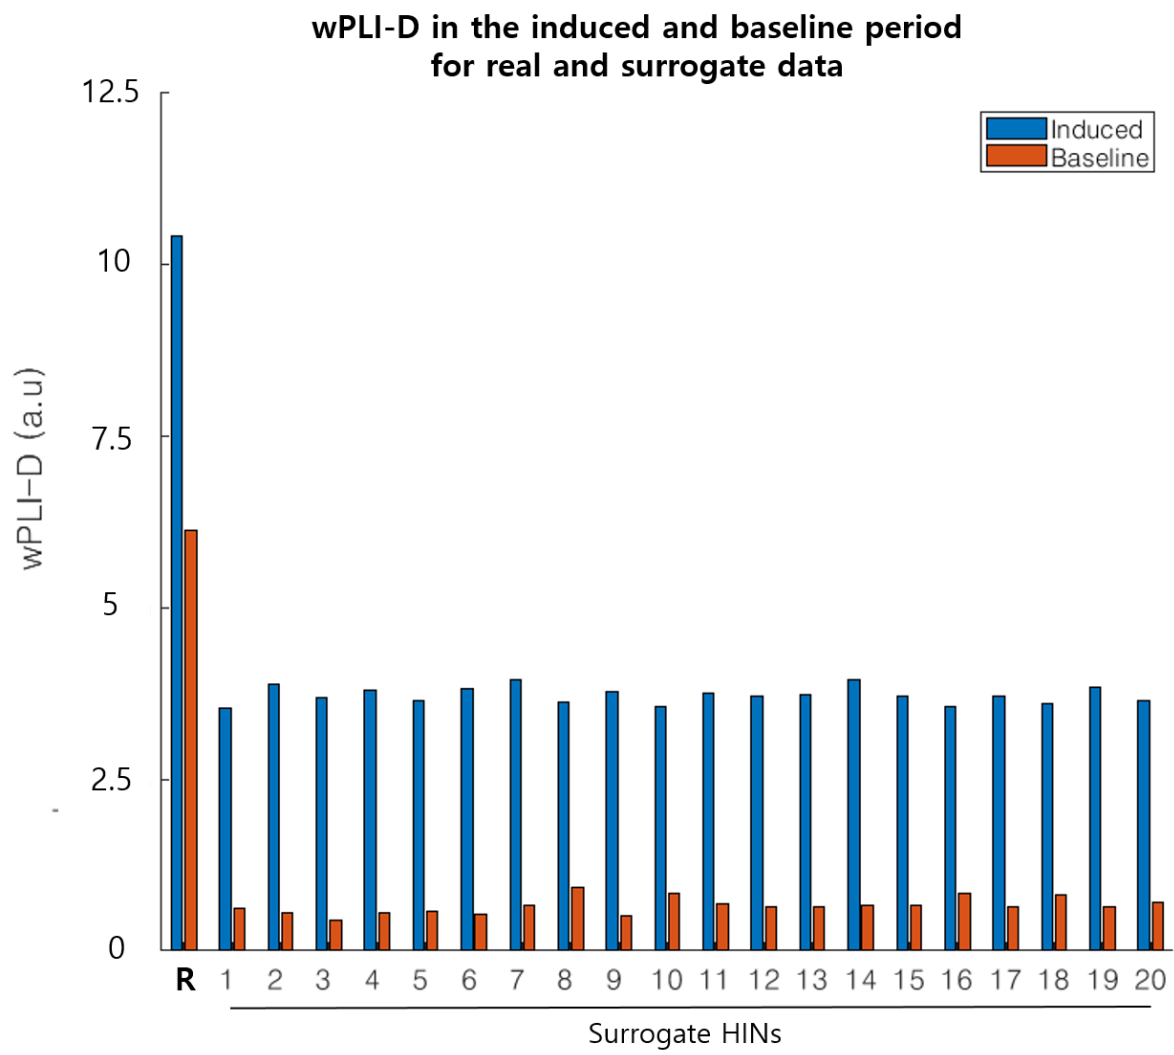

**Figure 1-1.**
